# Supplementary material for: Facile synthesis of a mesoporous TiO2 film templated by a block copolymer for photocatalytic applications
Source: Royal Society of Chemistry journal article supplement (doi:10.1039/d1nj02997e), 2021-01-01
Supplement: d1nj02997e1.pdf [file d1nj02997e1.pdf]

*New Journal of Chemistry*

# **Facile synthesis of mesoporous TiO<sub>2</sub> film templated by block copolymer for photocatalytic applications**

Olufemi Olatidoye, Daria Thomas and Bishnu P. Bastakoti\*

Department of Chemistry

North Carolina A&T State University

[bpbastakoti@ncat.edu](mailto:bpbastakoti@ncat.edu)

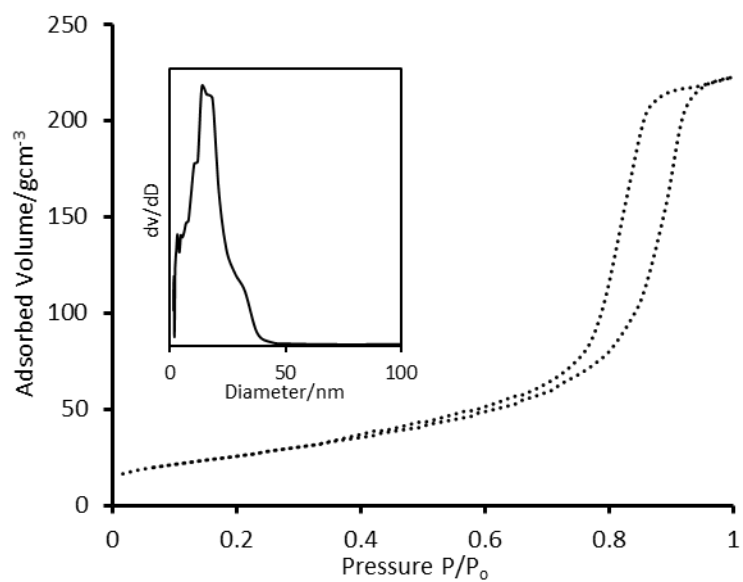

**Figure S1.** BET isotherm and pore size distribution of mesoporous  $\text{TiO}_2$  Powder.

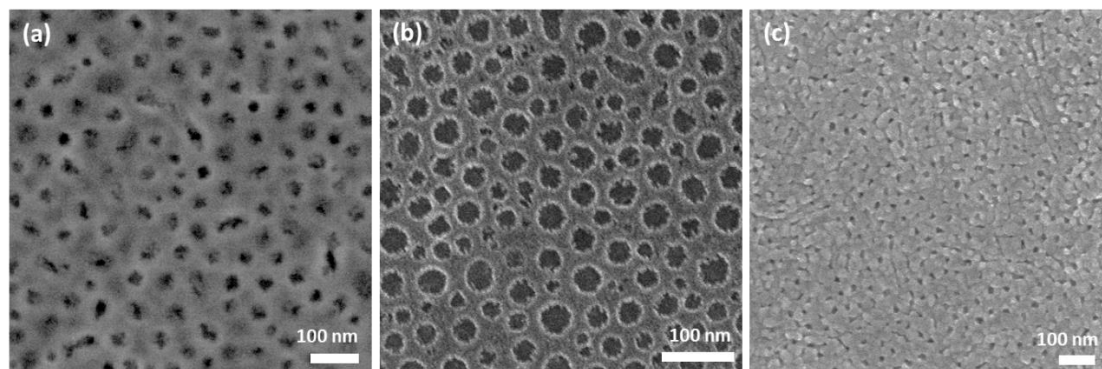

**Figure S2.** SEM images of mesoporous  $\text{TiO}_2$  calcined at (a) 300 °C, (b) 550 °C, and (c) 700 °C.
